# Supplementary material for: Context-specific gene regulatory networks subdivide intrinsic subtypes of breast cancer
Source: PubMed Central journal article supplement (PMC3073183; doi:10.1186/1471-2105-12-s2-s3), 2011-03-29
Supplement: 1471-2105-12-S2-S3-S1.pdf [file 1471-2105-12-S2-S3-S1.pdf]

## Supplement tables

Functional annotation for the genes within contexts with gene sets from MSigDB

(<http://www.broadinstitute.org/gsea/msigdb/index.jsp>).

**Supplement table 1 - Functional annotations for Context 16**

| Gene set name                                          | Genes in gene set (K) | Description                                                                                        | Overlap (k) | k/K    | p-value  |
|--------------------------------------------------------|-----------------------|----------------------------------------------------------------------------------------------------|-------------|--------|----------|
| <i>Lien Breast Carcinoma Metaplastic vs Ductal Dn</i>  | 110                   | Genes down-regulated between two breast carcinoma subtypes: metaplastic (MCB) and ductal (DCB).    | 8           | 0.0727 | 0.000000 |
| <i>Charafe Breast Cancer Luminal vs Mesenchymal Up</i> | 456                   | Genes up-regulated in luminal-like breast cancer cell lines compared to the mesenchymal-like ones. | 8           | 0.0175 | 0.000000 |
| <i>Charafe Breast Cancer Luminal vs Basal Up</i>       | 383                   | Genes up-regulated in luminal-like breast cancer cell lines compared to the basal-like ones.       | 7           | 0.0183 | 0.000000 |
| <i>Vantveer Breast Cancer ESR1 Up</i>                  | 175                   | Genes up-regulated in the luminal B subtype of breast cancer.                                      | 5           | 0.0286 | 0.000000 |

**Supplement table 2 - Functional annotations for Context 48**

| Gene set name                                 | Genes in gene set (K) | Description                                                                                                                                                                 | Overlap (k) | k/K    | p-value  |
|-----------------------------------------------|-----------------------|-----------------------------------------------------------------------------------------------------------------------------------------------------------------------------|-------------|--------|----------|
| <i>Sotiriou Breast Cancer Grade 1 vs 3 Up</i> | 153                   | Up-regulated genes whose expression correlated with histologic grade of invasive breast cancer tumors: comparison of grade 1 vs grade 3.                                    | 14          | 0.0915 | 0.000000 |
| <i>Farmer Breast Cancer Basal vs Luminal</i>  | 335                   | Genes which best discriminated between two groups of breast cancer according to the status of ESR1 and AR [Gene ID=2099, 367]: basal (ESR1- AR-) and luminal (ESR1+ AR+).   | 11          | 0.0328 | 0.000000 |
| <i>Blum Response to Salirasib Dn</i>          | 343                   | Selected genes down-regulated in response to the Ras inhibitor salirasib [PubChem=5469318] in a panel of cancer cell lines with constantly active HRAS [Gene ID=3265].      | 9           | 0.0262 | 0.000000 |
| <i>Rhodes Undifferentiated Cancer</i>         | 60                    | Genes commonly up-regulated in undifferentiated cancer relative to well-differentiated cancer, based on the meta-analysis of the OncoMine gene expression database.         | 6           | 0.1    | 0.000000 |
| <i>Naderi Breast Cancer Prognosis Up</i>      | 37                    | Up-regulated genes in the breast cancer prognostic signature of 70 genes that significantly correlated with survival.                                                       | 5           | 0.1351 | 0.000000 |
| <i>Poola Invasive Breast Cancer Up</i>        | 304                   | Genes up-regulated in atypical ductal hyperplastic tissues from patients with (ADHC) breast cancer vs those without the cancer (ADH).                                       | 8           | 0.0263 | 0.000000 |
| <i>Vantveer Breast Cancer Metastasis Dn</i>   | 107                   | Genes whose expression is significantly and negatively correlated with poor breast cancer clinical outcome (defined as developing distant metastases in less than 5 years). | 6           | 0.0561 | 0.000000 |

**Supplement table 3 - Functional annotations for Context 50**

| Geneset name                                      | Genes in gene set (K) | Description                                                                                                                | Overlap (k) | k/K    | p-value  |
|---------------------------------------------------|-----------------------|----------------------------------------------------------------------------------------------------------------------------|-------------|--------|----------|
| <i>Reactome Tie2 Signaling</i>                    | 18                    | Genes involved in Tie2 Signaling                                                                                           | 2           | 0.1111 | 0.000179 |
| <i>Reactome Signaling in Immune System</i>        | 366                   | Genes involved in Signaling in Immune system                                                                               | 4           | 0.0109 | 0.000684 |
| <i>Cell Cell Signaling</i>                        | 400                   | Genes annotated by the GO term GO:0007267. Any process that mediates the transfer of information from one cell to another. | 4           | 0.01   | 0.000952 |
| <i>KEGG Rig I like Receptor Signaling Pathway</i> | 71                    | RIG-I-like receptor signaling pathway                                                                                      | 2           | 0.0282 | 0.002800 |

**Supplement table 4 - Functional annotations for Context 51**

| Gene set name                                 | Genes in gene set (K) | Description                                                                                                                                                                                                                                                                                | Overlap (k) | k/K    | p-value  |
|-----------------------------------------------|-----------------------|--------------------------------------------------------------------------------------------------------------------------------------------------------------------------------------------------------------------------------------------------------------------------------------------|-------------|--------|----------|
| <i>Sotiriou Breast Cancer Grade 1 vs 3 Up</i> | 153                   | Up-regulated genes whose expression correlated with histologic grade of invasive breast cancer tumors: comparison of grade 1 vs grade 3.                                                                                                                                                   | 5           | 0.0327 | 0.000000 |
| <i>Mitotic Cell Cycle Checkpoint</i>          | 21                    | Genes annotated by the GO term GO:0007093. A signal transduction-based surveillance mechanism that ensures accurate chromosome replication and segregation by preventing progression through a mitotic cell cycle until conditions are suitable for the cell to proceed to the next stage. | 3           | 0.1429 | 0.000000 |
| <i>Cell Cycle Checkpoint GO 0000075</i>       | 47                    | Genes annotated by the GO term GO:0000075. A point in the eukaryotic cell cycle where progress through the cycle can be halted until conditions are suitable for the cell to proceed to the next stage.                                                                                    | 3           | 0.0638 | 0.000000 |

**Supplement table 5 - Functional annotations for Context 130**

| Gene set name                                   | Genes in gene set (K) | Description                                                                                                            | Overlap (k) | k/K    | p-value  |
|-------------------------------------------------|-----------------------|------------------------------------------------------------------------------------------------------------------------|-------------|--------|----------|
| <i>Streicher LSM1 Targets Up</i>                | 40                    | Genes up-regulated in MCF10A cells (breast cancer) by expression of LSM1 [Gene ID=27257] off a letiviral vector.       | 2           | 0.05   | 0.000002 |
| <i>Haddad T Lymphocyte and NK Progenitor Up</i> | 83                    | Genes up-regulated in hematopoietic progenitor cells (HPC) of T lymphocyte and NK (natural killer) lineage.            | 2           | 0.0241 | 0.000007 |
| <i>Doane Breast Cancer ESR1 Up</i>              | 114                   | Genes changed in breast cancer samples according to the ESR1 [Gene ID=2099] status: ER positive vs ER negative tumors. | 2           | 0.0175 | 0.000014 |

**Supplement table 6 - Functional annotations for Context 145**

| Gene set name                                    | Genes in gene set (K) | Description                                                                                                                                                                                                                   | Overlap (k) | k/K    | p-value  |
|--------------------------------------------------|-----------------------|-------------------------------------------------------------------------------------------------------------------------------------------------------------------------------------------------------------------------------|-------------|--------|----------|
| <i>Protein Metabolic Process</i>                 | 1199                  | Genes annotated by the GO term GO:0019538. The chemical reactions and pathways involving a specific protein, rather than of proteins in general. Includes protein modification.                                               | 4           | 0.0033 | 0.000141 |
| <i>Secretion by Cell</i>                         | 114                   | Genes annotated by the GO term GO:0032940. The regulated release of a substance by a cell.                                                                                                                                    | 2           | 0.0175 | 0.000374 |
| <i>Membrane Organization and Biogenesis</i>      | 133                   | Genes annotated by the GO term GO:0016044. A process that is carried out at the cellular level which results in the formation, arrangement of constituent parts, or disassembly of membranes inside and surrounding the cell. | 2           | 0.015  | 0.000509 |
| <i>Positive Regulation of Catalytic Activity</i> | 157                   | Genes annotated by the GO term GO:0043085. Any process that activates or increases the activity of an enzyme.                                                                                                                 | 2           | 0.0127 | 0.000707 |
| <i>Cellular Protein Metabolic Process</i>        | 1086                  | Genes annotated by the GO term GO:0044267. The chemical reactions and pathways involving a specific protein, rather than of proteins in general, occurring at the level of an individual cell. Includes protein modification. | 3           | 0.0028 | 0.002140 |
| <i>Macromolecular Complex Assembly</i>           | 276                   | Genes annotated by the GO term GO:0065003. The aggregation, arrangement and bonding together of a set of macromolecules to form a complex.                                                                                    | 2           | 0.0072 | 0.002160 |
| <i>Cellular Macromolecule Metabolic Process</i>  | 1100                  | Genes annotated by the GO term GO:0044260. The chemical reactions and pathways involving macromolecules, large molecules including proteins, nucleic acids and carbohydrates, as carried out by individual cells.             | 3           | 0.0027 | 0.002220 |
| <i>Cellular Component Assembly</i>               | 294                   | Genes annotated by the GO term GO:0022607. A cellular process that results in the assembly of a part of the cell.                                                                                                             | 2           | 0.0068 | 0.002440 |

**Supplement table 7 - Functional annotations for Context 168**

| Gene set name                            | Genes in gene set (K) | Description                                                                                                                                                                                                                                                  | Overlap (k) | k/K    | p-value  |
|------------------------------------------|-----------------------|--------------------------------------------------------------------------------------------------------------------------------------------------------------------------------------------------------------------------------------------------------------|-------------|--------|----------|
| <i>Benporath ES Core Nine Correlated</i> | 100                   | Breast cancer compendium: 100 transcription regulators showing most correlated expression with the 9 'embryonic stem cell' transcription factors that are preferentially and coordinately overexpressed in the high-grade, ER-negative breast cancer tumors. | 2           | 0.02   | 0.000155 |
| <i>Smid Breast Cancer Basal Up</i>       | 676                   | Genes up-regulated in basal subtype of breast cancer samples.                                                                                                                                                                                                | 4           | 0.0059 | 0.000003 |
